# Supplementary material for: Epitaxially grown single-crystalline SrTiO3 membranes using a solution-processed, amorphous SrCa2Al2O6 sacrificial layer
Source: Royal Society of Chemistry journal article supplement (doi:10.1039/d4tc02030h), 2024-01-01
Supplement: d4tc02030h1.pdf [file d4tc02030h1.pdf]

## Supporting Information

### **Epitaxially Grown Single-Crystalline SrTiO<sub>3</sub> Membranes Using a Solution-Processed, Amorphous SrCa<sub>2</sub>Al<sub>2</sub>O<sub>6</sub> Sacrificial Layer**

Shivasheesh Varshney<sup>1</sup>, Martí Ramis<sup>2</sup>, Sooho Choo<sup>1</sup>, Mariona Coll<sup>2</sup>, Bharat Jalan<sup>1</sup>

<sup>1</sup>Department of Chemical Engineering and Materials Science, University of Minnesota, Twin Cities, Minnesota, 55455, USA

<sup>2</sup>ICMAB-CSIC, Campus UAB 08193, Bellaterra, Barcelona, Spain

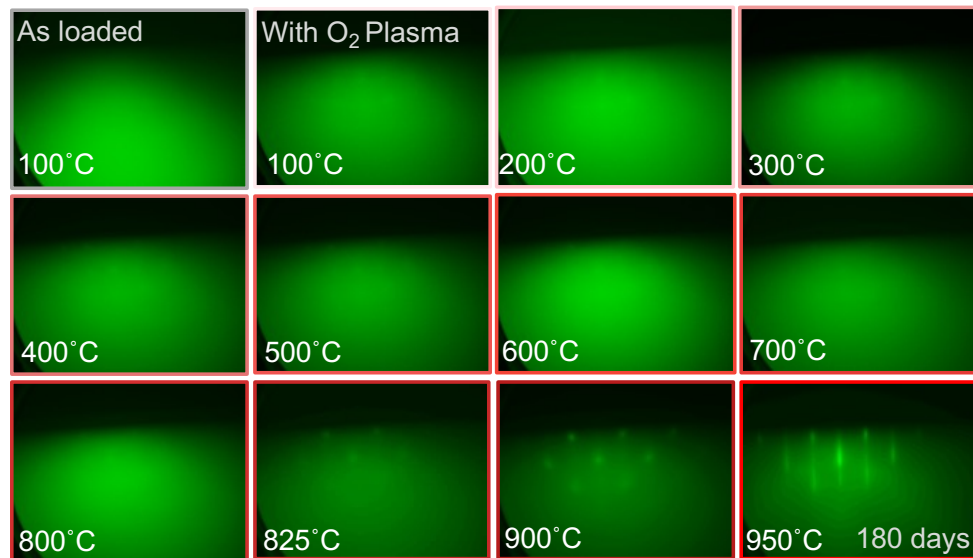

**Figure S1:** RHEED evolution as a function of substrate temperature during oxygen plasma annealing of  $\text{SrCa}_2\text{Al}_2\text{O}_6$  on STO (001) substrate. The substrate temperature at which the image is taken is indicated on the image. All images are taken along [100] azimuthal direction.

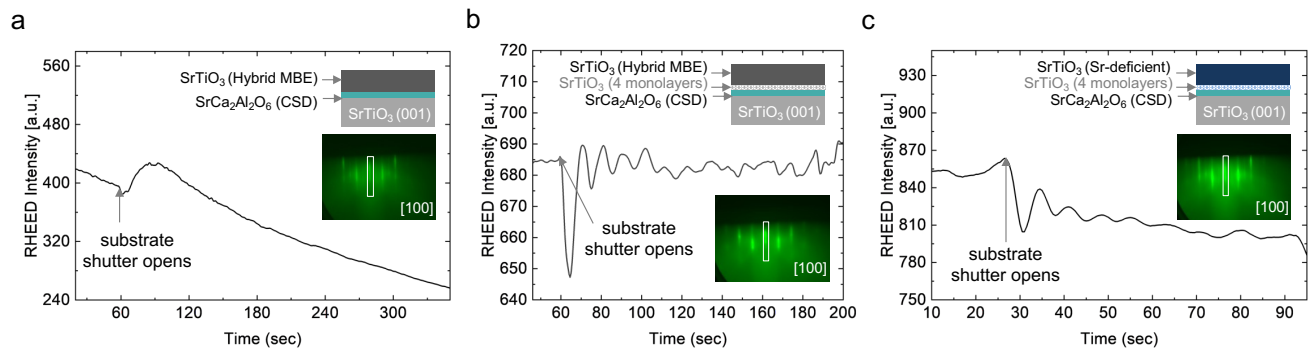

**Figure S2:** Time-dependent RHEED intensity profile during STO growth. (a) when STO is grown directly on annealed  $\text{SrCa}_2\text{Al}_2\text{O}_6$ . (b) when STO is grown on a 4-monolayers of STO on  $\text{SrCa}_2\text{Al}_2\text{O}_6$ . (c) when Sr-deficient STO is grown on a 4-monolayers of STO on  $\text{SrCa}_2\text{Al}_2\text{O}_6$ . Inset of (a, b, c) show a sample schematic and the RHEED pattern with a box where time-dependent intensity was recorded.

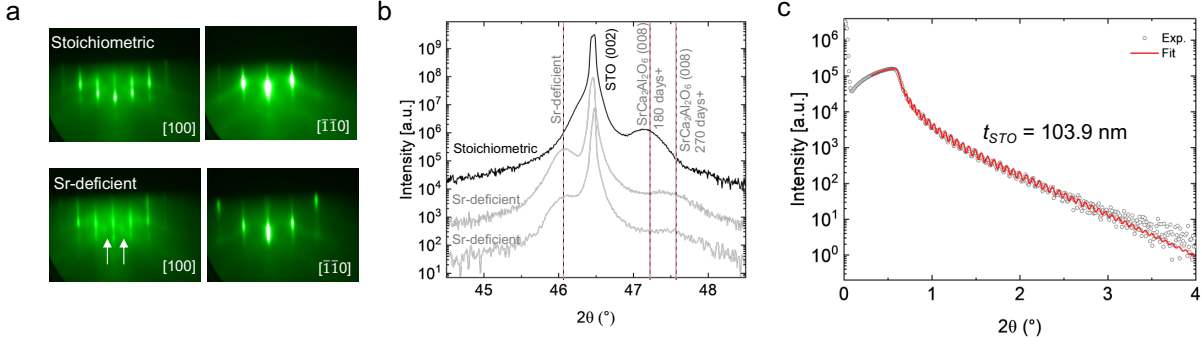

**Figure S3:** RHEED and X-ray diffraction of Sr-deficient and stoichiometric STO /  $\text{SrCa}_2\text{Al}_2\text{O}_6$ / STO (001). (a) RHEED images after STO growth taken at 100 °C along [100] and  $[\bar{1}\bar{1}0]$  directions. (b)  $2\theta$ - $\omega$  coupled scan of as-grown films. The film with TTIP/Sr ratio of 103.84 is stoichiometric, the out-of-plane lattice parameter extracted from STO (002) peak is  $3.905 \pm 0.002 \text{ \AA}$  and from  $\text{Sr}_x\text{Ca}_{3-x}\text{Al}_2\text{O}_6$  (008) is  $15.39 \pm 0.002 \text{ \AA}$  ( $\div 4 = 3.849 \text{ \AA}$ ), indicating  $x \sim 0.9$  (assuming relaxed lattice parameter). The film with TTIP/Sr ratio of 134.47 is Sr-deficient, the lattice parameter extracted from STO (002) peak is  $3.936 \pm 0.002 \text{ \AA}$  and from  $\text{Sr}_x\text{Ca}_{3-x}\text{Al}_2\text{O}_6$  (008) is  $15.30 \pm 0.002 \text{ \AA}$  ( $\div 4 = 3.825 \text{ \AA}$ ), indicating  $x \sim 0.3$  (assuming relaxed lattice parameter). This film is grown after 270+ days of  $\text{SrCa}_2\text{Al}_2\text{O}_6$  sample preparation, and nominal deviation from peak position is expected in hygroscopic samples. The reduction in intensity of SCAO suggests change in crystallinity over the period of time. (c) x-ray reflectivity scan of 100 nm STO/ 20 nm  $\text{SrCa}_2\text{Al}_2\text{O}_6$ / STO (001) substrate with a fit done using GenX software, indicating a thickness of 103.9 nm.

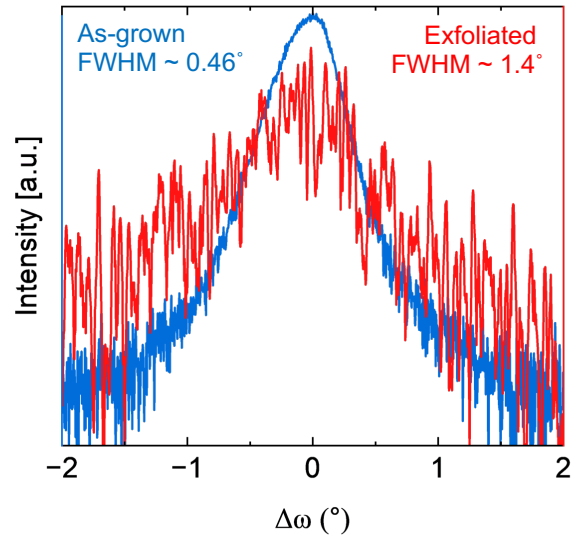

**Figure S4:** Rocking curve of as-grown STO film and after exfoliation and transfer onto a Au-coated Si substrate. The FWHM of the film has changed from 0.46° to 1.40°.

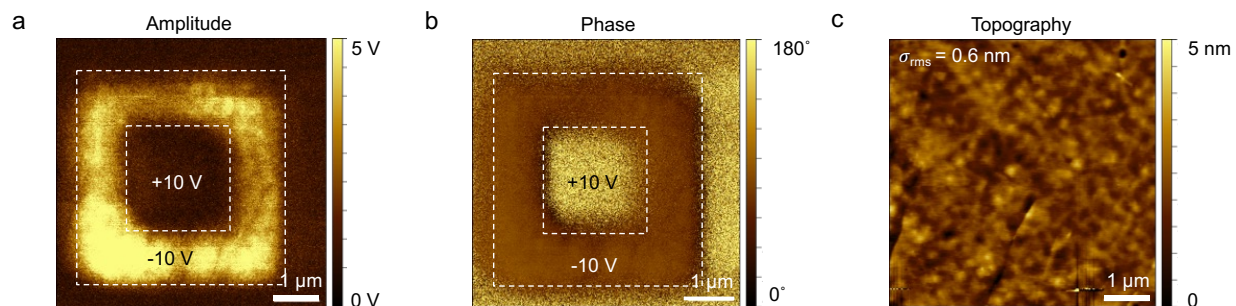

**Figure S5:** Box-pattern on Sr-deficient STO membrane on a different region than shown in Figure 4. First, a  $4 \times 4 \mu\text{m}^2$  square area was scanned with -10 V tip bias with bottom electrode grounded. A  $2 \times 2 \mu\text{m}^2$  square area that was scanned with +10 V tip bias. Finally, a  $6 \times 6 \mu\text{m}^2$  area was scanned with 0 V tip bias. The  $6 \times 6 \mu\text{m}^2$  area scan with 0 V also captures the pristine state of the sample. And the -10 V and +10 V region represents the polled state of the sample. (a) Amplitude demonstrating contrast between regions that were scanned with -10 V and 10 V. (b) Phase demonstrating contrast of nearby  $180^\circ$  between the region that was scanned with -10 V and 10 V. (c) Topography scan of the membrane done during 0 V scan. This scan further reveals ferroelectric-like switching on a different region on Sr-deficient membrane.

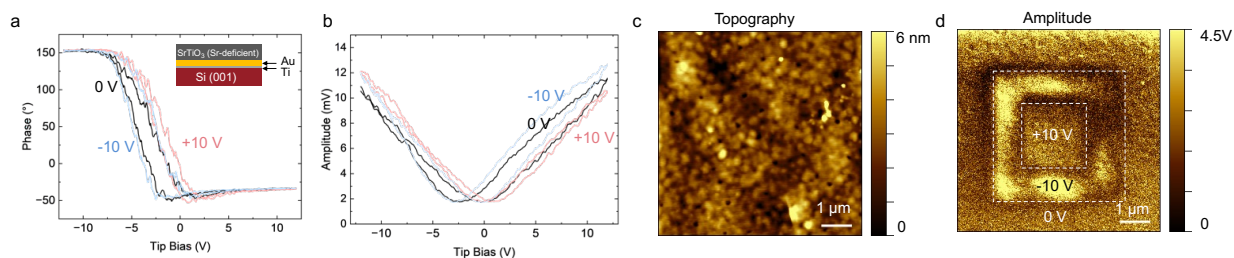

**Figure S6:** PFM hysteresis loops, topography, and amplitude on Sr-deficient STO membrane on the region shown in Figure 4a. (a) Phase and amplitude hysteresis loops obtained on Sr-deficient STO membrane on a surface polled to -10 V, +10 V, and pristine surface (0 V). The scans on the polled region were done after 30 minutes of polling process. A 180° flipping is observed in phase angle in all three areas of the sample, -10 V (polled), +10 V (polled), and 0 V (pristine). These loops demonstrate switching in the sample at various regions. (b) Amplitude and bias butterfly loops done on three areas of the sample as discussed in Figure S6a. (c-d) Topography and amplitude of membrane after box-writing shown in Figure 4a. A minimal contrast is observed in amplitude when +10 V and 0 V compared since the pristine state of the sample could have dipoles in the out-of-plane direction.
